# Supplementary material for: The atypical antipsychotic olanzapine causes weight gain by targeting serotonin receptor 2C
Source: JCI journal article supplement (doi:10.1172/jci93362), 2017-08-13
Supplement: sd1 [file 1]

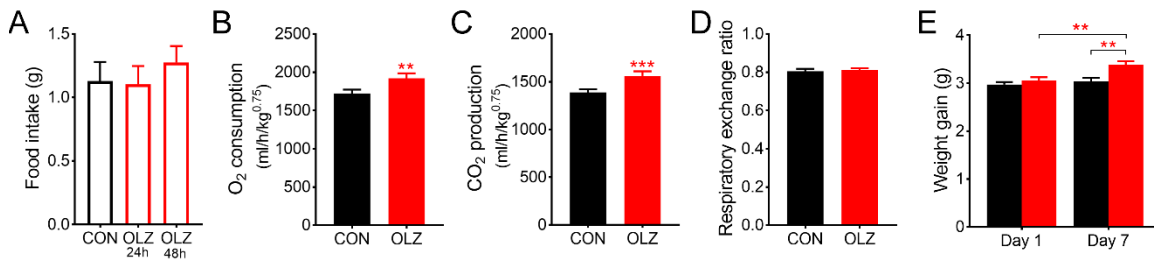

**Supplementary figure 1.** Effects of olanzapine treatment on energy balance. **(A)** Food intake during the light phase (6 A.M. to 6 P.M.) over 2 days. **(B)** O<sub>2</sub> consumption. **(C)** CO<sub>2</sub> production. **(D)** Respiratory exchange ratio. **(E)** Weight gain in ad libitum fed mice after 7 days (n=7). Results are shown as the mean  $\pm$  SEM. \*\*P < 0.01, \*\*\*P < 0.001 versus other genotypes assessed using either a Student's t test or two-way ANOVA with Sidak's multiple comparisons test.

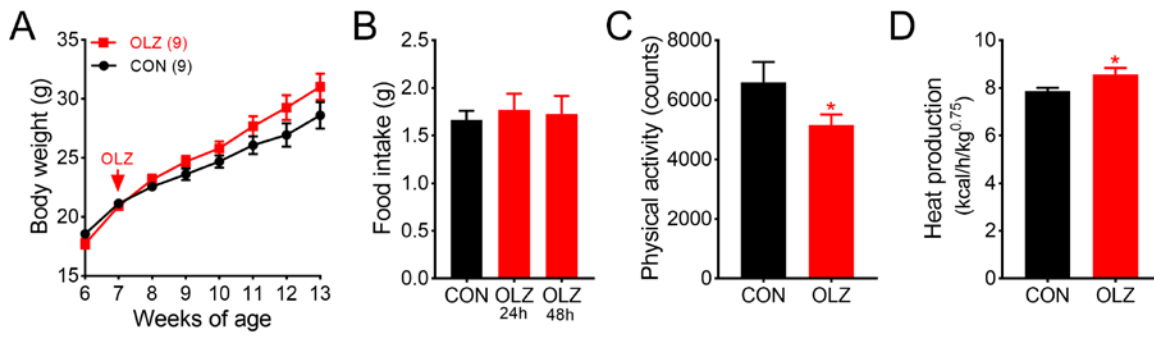

**Supplementary figure S2.** Effects of olanzapine treatment on energy balance in male C57BL/6 mice. **(A)** Body weight. **(B-D)** Metabolic cage analysis (n=8, per group) of food intake **(B)**, physical activity **(C)**, and heat production **(D)**. Results are shown as the mean  $\pm$  SEM. \*P < 0.05, assessed using either a Student's t test or ANOVA.

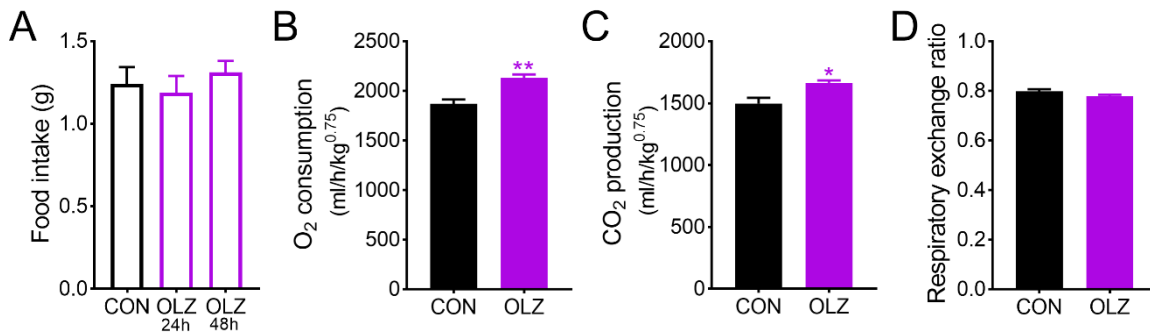

**Supplementary figure S3.** Effects of olanzapine treatment on energy balance in *Htr2c* null mice. **(A)** Food intake during light phase (6 A.M. to 6 P.M.) of a day. **(B)** O<sub>2</sub> consumption. **(C)** CO<sub>2</sub> production. **(D)** Respiratory exchange ratio. Results are shown as the mean ± SEM. \*P < 0.05, \*\*P < 0.01 versus other genotypes assessed using either a Student's t test or ANOVA.

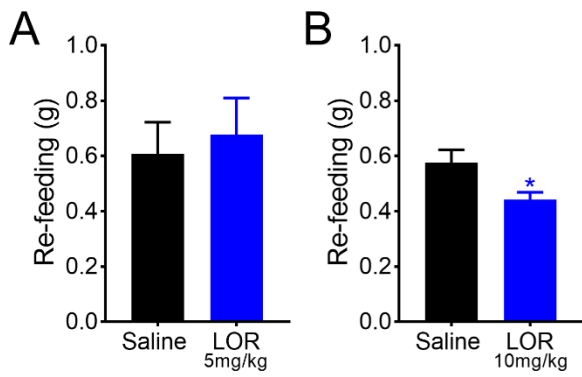

**Supplementary figure S4.** Lorcaserin suppresses food intake in overnight fasted mice. **(A and B)** Food intake (30 min) in overnight fasted mice (n=4) after saline or lorcaserin (LOR) treatment. Results are shown as the mean  $\pm$  SEM. \*P < 0.05, Student's t test.
